# Supplementary material
Source: publisher figshare collection journal article supplement (https://acs.figshare.com/ndownloader/files/13848017)
Supplement: Supplementary file 1 [file 13848017]

## **Supporting Information**

### **Insight into deactivation behavior and determination of generation time over hydroxyapatite catalyst in the dehydration of lactic acid to acrylic acid**

Chao Li, Qiangqiang Zhu, Ziheng Cui, Bin Wang\*, Tianwei Tan

Beijing Key Laboratory of Bioprocess, National Energy R&D Center for Biorefinery, Beijing  
University of Chemical Technology, No. 15 of North 3<sup>rd</sup> ring East Road, Chaoyang District,  
Beijing 100029, P. R. China

\*Corresponding author

E-mail: [wangbin@mail.buct.edu.cn](mailto:wangbin@mail.buct.edu.cn)

**Table S1.** Best performances reported in literatures for LA dehydration and corresponding catalysts.

| Catalyst                                                   | T<br>(°C) | TOS<br>(h) | LA conc.<br>(wt%) | LA Conv.<br>(%) | AA yield (sel.)<br>(%) | Ref.         |
|------------------------------------------------------------|-----------|------------|-------------------|-----------------|------------------------|--------------|
| Na <sub>2</sub> HPO <sub>4</sub> /NaY                      | 340       | 2          | 34                | 93              | 73 (79)                | (Zhang et    |
| NaOH-NaH <sub>2</sub> PO <sub>4</sub> -ZSM-5               | 350       | 9          | 30                | 97              | 76 (78)                | (Zhang et    |
| Ca <sub>2</sub> P <sub>2</sub> O <sub>7</sub> (Ca/P= 0.76) | 400       | 20         | 25                | 100             | 78 (78)                | (C. Ghantani |
| HAP (Ca/P=1.62)                                            | 360       | 8          | 36                | 84              | 62 (74)                | (Yan et al., |
| HAP (Ca/P=1.55)                                            | 400       | 6          | 38                | 90              | 78 (87)                | (Matsuura et |
| HAP (Ca/P=1.55)                                            | 400       | 50         | 38                | 90              | 70 (78)                | (Matsuura et |

**Table S2.** Composition (Ca/P molar ratio) of the hydroxyapatite catalysts.

|          | Ca/P molar ratio    |      |
|----------|---------------------|------|
|          | Theory <sup>a</sup> | XRF  |
| HAP-1.45 | 1.45                | 1.47 |
| HAP-1.50 | 1.50                | 1.53 |
| HAP-1.55 | 1.55                | 1.57 |
| HAP-1.60 | 1.60                | 1.61 |
| HAP-1.65 | 1.65                | 1.64 |

<sup>a</sup>The starting molar  $\text{Ca}(\text{NO}_3)_2/(\text{NH}_4)_2\text{HPO}_4$  ratio in the preparation solution.

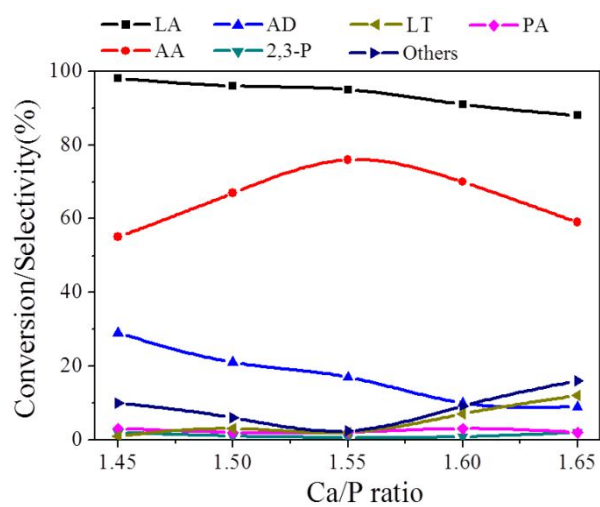

**Figure S1.** Effect of Ca/P ratio on catalytic performance.

Conditions: calcination temperature 500 °C; reaction temperature 350 °C; reaction time 4 h;  
catalyst: 1g; particle size: 20–40 meshes; carrier gas N<sub>2</sub>: 24 mL min<sup>-1</sup>; feed flow rate: 1.2 mL h<sup>-1</sup>;  
LA feedstock: 40 wt% in water.

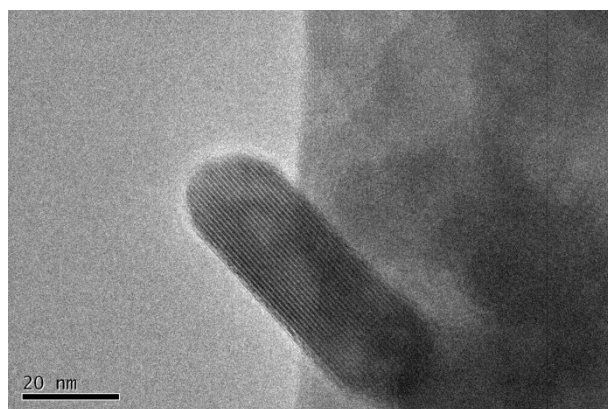

**Figure S2.** SEM image of the fresh HAP catalyst.

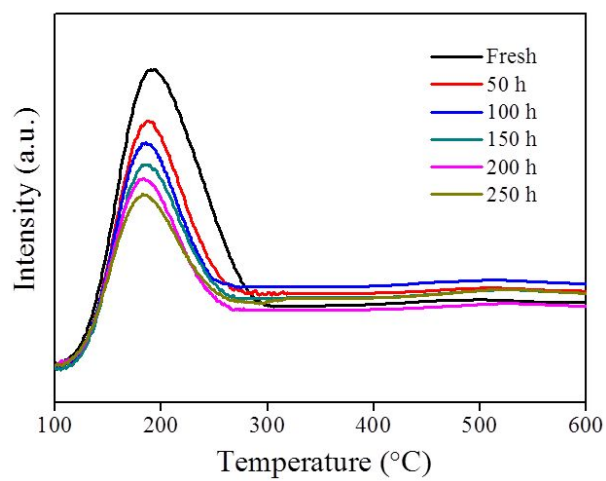

**Figure S3.** (a) NH<sub>3</sub>-TPD patterns of the HAP catalysts for different TOS values

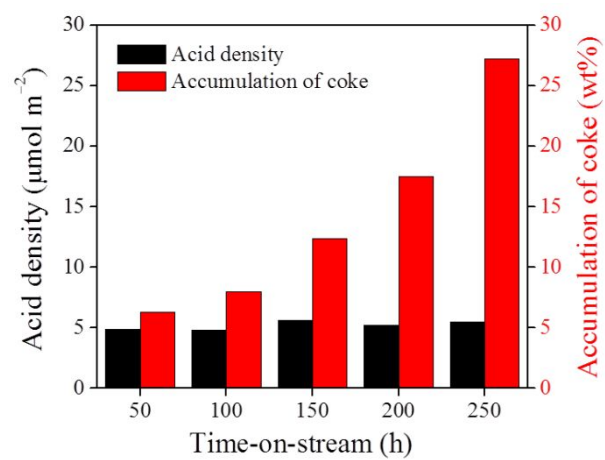

**Figure S4.** Relationship between acid density and coke accumulation.
